# Supplementary material for: Trends in Outcomes of Major Intracerebral Haemorrhage in a National Cohort of Very Preterm Born Infants in Switzerland
Source: MDPI journal article supplement (doi:10.3390/children10081412), 2023-08-19
Supplement: s1 [file s1]

**Table S1: Trend of outcomes of very preterm infants with grade 3 intraventricular haemorrhage (G3-IVH) and periventricular haemorrhagic infarction (PVHI) in Switzerland between 2002 and 2014.**

| N (%), mean (SD)         | 2002        | 2003       | 2004        | 2005        | 2006        | 2007        | 2008       | 2009        | 2010        | 2011        | 2012        | 2013        | 2014        | Total         | Z <sup>a</sup> / $\beta$ <sup>b</sup> | p-value           |
|--------------------------|-------------|------------|-------------|-------------|-------------|-------------|------------|-------------|-------------|-------------|-------------|-------------|-------------|---------------|---------------------------------------|-------------------|
| <b>Total live births</b> | 322         | 301        | 362         | 349         | 371         | 361         | 377        | 397         | 428         | 441         | 420         | 389         | 438         | 4956          | N.A.                                  | N.A.              |
| <b>G3-IVH</b>            | 8 (2%)      | 13 (4%)    | 10 (3%)     | 12 (3%)     | 21 (5%)     | 18 (5%)     | 9 (2%)     | 15 (3%)     | 9 (2%)      | 14 (3%)     | 16 (3%)     | 11 (2%)     | 16 (3%)     | 172/4956 (3%) | 0.17 <sup>a</sup>                     | .103 <sup>a</sup> |
| - Gestational age        | 28.1 (1.5)  | 26.9 (1.8) | 26.8 (1.1)  | 27.1 (1.4)  | 27.1 (1.3)  | 27.0 (1.6)  | 27.3 (1.3) | 27.2 (1.7)  | 26.9 (1.7)  | 26.7 (1.4)  | 26.0 (0.9)  | 26.9 (1.9)  | 26.5 (1.4)  | -             | - 0.18 <sup>b</sup>                   | .020 <sup>b</sup> |
| - Death                  | 3/8 (37%)   | 6/13 (46%) | 4/10 (40%)  | 2/12 (17%)  | 7/21 (33%)  | 7/18 (39%)  | 3/9 (33%)  | 2/15 (13%)  | 1/9 (11%)   | 5/14 (36%)  | 5/16 (31%)  | 5/11 (45%)  | 6/16 (38%)  | 56/172 (33%)  | 0.19 <sup>a</sup>                     | .845 <sup>a</sup> |
| Withdrawal of care       | 3/3         | 2/6        | 3/4         | 2/2         | 7/7         | 7/7         | 3/3        | 1/2         | 0/1         | 4/5         | 4/5         | 4/5         | 5/6         | 45/56         | N.A.                                  | N.A.              |
| - Survivors at 2 years   | 5/8 (63%)   | 7/13 (54%) | 6/10 (60%)  | 10/12 (83%) | 14/21 (67%) | 11/18 (61%) | 6/9 (67%)  | 13/15 (87%) | 8/9 (89%)   | 9/14 (64%)  | 11/16 (69%) | 6/11 (55%)  | 10/16 (63%) | 116/172 (67%) | N.A.                                  | N.A.              |
| Follow-up at 2 years     | 5/5         | 5/7        | 3/6         | 9/10        | 13/14       | 10/11       | 6/6        | 12/13       | 8/8         | 8/9         | 10/11       | 6/6         | 9/10        | 104/116       | N.A.                                  | N.A.              |
| NDI                      | 3/5 (60%)   | 2/5 (40%)  | 1/3 (33%)   | 3/9 (33%)   | 4/13 (31%)  | 1/10 (10%)  | 2/6 (33%)  | 3/12 (25%)  | 4/8 (50%)   | 2/8 (33%)   | 5/10 (50%)  | 2/6 (33%)   | 3/9 (33%)   | 35/104 (34%)  | -0.31 <sup>a</sup>                    | .757 <sup>a</sup> |
| Favourable outcome       | 2/5 (40%)   | 3/5 (60%)  | 2/3 (67%)   | 6/9 (67%)   | 9/13 (69%)  | 9/10 (90%)  | 4/6 (67%)  | 9/12 (75%)  | 4/8 (50%)   | 6/8 (67%)   | 5/10 (50%)  | 4/6 (67%)   | 6/9 (67%)   | 69/104 (66%)  | -0.65 <sup>a</sup>                    | .516 <sup>a</sup> |
| <b>PVHI</b>              | 25 (8%)     | 15 (5%)    | 31 (9%)     | 17 (49%)    | 28 (8%)     | 25 (7%)     | 15 (4%)    | 26 (7%)     | 24 (6%)     | 20 (5%)     | 21 (5%)     | 20 (5%)     | 23 (5%)     | 290/4956 (6%) | 0.07 <sup>a</sup>                     | .218 <sup>a</sup> |
| - Gestational age        | 26.4 (1.5)  | 26.5 (1.5) | 26.8 (1.7)  | 26.8 (1.4)  | 26.7 (1.8)  | 27.1 (1.8)  | 26.7 (1.7) | 26.1 (1.4)  | 25.9 (1.5)  | 26.0 (1.4)  | 26.5 (1.7)  | 26.0 (1.4)  | 26.1 (1.4)  | -             | -0.17 <sup>b</sup>                    | .004 <sup>b</sup> |
| - Death                  | 15/25 (60%) | 9/15 (60%) | 21/31 (68%) | 10/17 (59%) | 20/28 (71%) | 14/25 (56%) | 9/15 (60%) | 16/26 (62%) | 13/24 (54%) | 11/20 (55%) | 12/21 (57%) | 12/20 (60%) | 13/23 (57%) | 175/290 (60%) | 0.87 <sup>a</sup>                     | .386 <sup>a</sup> |
| Withdrawal of care       | 10/15       | 7/9        | 11/21       | 10/10       | 18/20       | 10/14       | 8/9        | 14/16       | 10/13       | 9/11        | 11/12       | 10/12       | 13/13       | 141/175       | N.A.                                  | N.A.              |
| - Survivors at 2 years   | 10/25 (40%) | 6/15 (40%) | 10/31 (32%) | 7/17 (41%)  | 8/28 (29%)  | 11/25 (44%) | 6/15 (40%) | 10/26 (38%) | 11/24 (46%) | 9/20 (45%)  | 9/21 (43%)  | 8/20 (40%)  | 10/23 (43%) | 115/290 (40%) | N.A.                                  | N.A.              |
| Follow-up at 2 years     | 7/10        | 5/6        | 4/10        | 5/7         | 8/8         | 10/11       | 4/6        | 9/10        | 8/11        | 8/9         | 8/9         | 7/8         | 9/10        | 92/115        | N.A.                                  | N.A.              |
| NDI                      | 4/7 (57%)   | 3/5 (60%)  | 2/4 (50%)   | 3/5 (60%)   | 7/8 (88%)   | 2/10 (20%)  | 2/4 (50%)  | 5/9 (56%)   | 4/8 (50%)   | 5/8 (63%)   | 3/8 (38%)   | 4/7 (57%)   | 5/9 (55%)   | 49/92 (53%)   | -0.54 <sup>a</sup>                    | .588 <sup>a</sup> |
| Favourable outcome       | 3/7 (43%)   | 2/5 (40%)  | 2/4 (0%)    | 2/5 (40%)   | 1/8 (13%)   | 8/10 (80%)  | 2/4 (50%)  | 4/9 (44%)   | 4/8 (50%)   | 3/8 (38%)   | 5/8 (23%)   | 3/7 (43%)   | 4/9 (45%)   | 43/92 (47%)   | -1.11 <sup>a</sup>                    | .265 <sup>a</sup> |

<sup>a</sup>, Cochran-Armitage test for trend; <sup>b</sup>, Univariate linear regression.
