# Supplementary material for: Trends in Outcomes of Major Intracerebral Haemorrhage in a National Cohort of Very Preterm Born Infants in Switzerland
Source: MDPI journal article supplement (doi:10.3390/children10081412), 2023-08-19
Supplement: s1 [file s1]

**Table S2: Neonatal baseline characteristics and demographics of infants visited at follow-up and lost to follow-up.**

| <b>Mean (SD), N (%)</b>             | <b>Infants<br/>visited at follow-up<br/>N = 196</b> | <b>Infants<br/>lost to follow-up<br/>N = 35</b> | <b>P value</b> |
|-------------------------------------|-----------------------------------------------------|-------------------------------------------------|----------------|
| Male sex                            | 115 (59)                                            | 17 (49)                                         | .266           |
| Gestational age (weeks)             | 27.2 (1.5)                                          | 27.4 (1.6)                                      | .573           |
| Multiple birth                      | 38 (19)                                             | 6 (17)                                          | .755           |
| Birth weight (grams)                | 999 (252)                                           | 1028 (258)                                      | .586           |
| Z - score                           | 0.18 (0.75)                                         | 0.14 (0.75)                                     | .497           |
| Small for gestational age           | 5 (2)                                               | 1 (3)                                           | .916           |
| Completed antenatal steroids course | 120 (61)                                            | 18 (51)                                         | .276           |
| Chorioamnionitis                    | 27 (14)                                             | 1 (3)                                           | .084           |
| Caesarean section                   | 137 (70)                                            | 25 (71)                                         | .889           |
| Arterial cord pH                    | 7.27 (0.12)                                         | 7.28 (0.16)                                     | .082           |
| 10' Apgar score                     | 8 (7 - 9)                                           | 8 (7 - 9)                                       | .755           |

|                                 |             |             |      |
|---------------------------------|-------------|-------------|------|
| NEC n (%)                       | 9 (5)       | 1 (3)       | .642 |
| Sepsis n (%)                    | 53 (27)     | 8 (23)      | .605 |
| Oxygen after 36 Weeks PMA n (%) | 46 (23)     | 3 (9)       | .047 |
| ROP n (%)                       | 6 (3)       | 0           | .300 |
| Patent arterial duct            | 112 (57)    | 18 (51)     | .118 |
| Length of hospital stay (days)  | 77.6 (30.3) | 72.1 (29.8) | .891 |
| Family socioeconomic status     | 6 (4 - 8)   | 6 (4 – 7.5) | .377 |

cUS, cranial ultrasound; G3-IVH, grade 3 intraventricular haemorrhage; PVHI, periventricular haemorrhagic infarction; NEC, necrotising enterocolitis; ROP, retinopathy of prematurity; PMA, postmenstrual age; independent Student's *t*- and  $\chi^2$  tests as appropriate.
